# Supplementary material for: Efficient genome editing in zebrafish using a CRISPR-Cas system
Source: Springer Nature journal article supplement (doi:10.1038/nbt.2501), 2013-01-29
Supplement: 41587_2013_BFnbt2501_MOESM8_ESM.pdf [file 41587_2013_BFnbt2501_MOESM8_ESM.pdf]

## **Supplementary Materials**

### **Supplementary Methods**

- Supplementary Discussion**      Calculated frequencies of embryo cells bearing bi-allelic alterations.
- Supplementary Figure 1**      Targeted indel mutations induced by engineered sgRNA:Cas9 at the *fh* gene (site #1).
- Supplementary Figure 2**      Targeted indel mutations induced by engineered sgRNA:Cas9 at the *fh* (site #2), *th1*, *apoea*, *rgs4*, *tph1a*, and *drd3* genes.
- Supplementary Figure 3**      Comparison of the length and types of indel mutations induced by ZFNs, TALENs, and sgRNA:Cas9 nuclease.
- Supplementary Figure 4**      Toxicities of engineered sgRNA/Cas9 nucleases in zebrafish embryos.
- Supplementary Figure 5**      Full DNA sequence of sgRNA expression vector pDR274.
- Supplementary Table 1**      Sequences of sgRNAs used in previously published *in vitro* studies and in the current *in vivo* study.
- Supplementary Table 2**      Eleven zebrafish gene sites targeted in this study and oligonucleotides used to make the associated customized sgRNA expression vectors.
- Supplementary Table 3**      Mutagenesis frequencies in the *fh* gene (site #1) induced by various concentrations of sgRNA and Cas9 mRNA.
- Supplementary Table 4**      Previously determined TALEN- and ZFN-induced mutation frequencies for the ten genes targeted in this study.
- Supplementary Table 5**      List of PCR primers used in this study.

## Supplementary Methods

### Cas9 nuclease expression plasmid

DNA encoding the Cas9 nuclease was amplified from the pMJ806 vector (Addgene Plasmid #39312) by PCR using the following primers, which add a T7 promoter site 5' to the translational start codon and a nuclear localization signal at the carboxy-terminal end of the Cas9 coding sequence:

OMM704: 5' -

ataagaatcgggccgctaatacagactcactatagggagagccgccaccATGGATAAGAAATACTCAATAGGCTTAG -3'

OMM705: 5' -

gtacataccggtcacatcctgcagctccaccgctcgagacttctcttcttcttgggagaaccGTCACCTCCTAGCTGAC -3'

The resulting PCR product was digested with the NotI and AgeI restriction enzymes and inserted into plasmid pMLM651. The resulting vector (plasmid pMLM3613) has a unique PmeI restriction site positioned 3' to the end of the Cas9 coding sequence that can be used to linearize the plasmids prior to run-off *in vitro* transcription and is available from Addgene (<http://www.addgene.org/crispr-cas>).

### Single guide RNA (sgRNA) expression vector

Vector pDR274 harboring a T7 promoter positioned upstream of a partial guide RNA sequence (full DNA sequence provided in **Supplementary Figure 5**) was generated by commercial DNA synthesis (Integrated DNA Technologies). To construct plasmids encoding sgRNAs bearing customized 20 nt targeting sequences, we digested pDR274 with BsaI restriction enzyme and then cloned a pair of appropriately designed and annealed oligonucleotides into this vector backbone. The annealed oligonucleotides have overhangs that are compatible with directional cloning into the BsaI-digested pDR274 vector. The genomic target DNA sites and sequences of the annealed oligonucleotides are listed in **Supplementary Table 2**. Plasmids pDR279, pDR299, pDR302, pDR311, pDR317, pDR330, pDR333, pDR336, and pDR338 encode sgRNAs that target sequences in the *fh* (site #1), *apoea*, *fh* (site#2), *rgs4*, *th1*, *tia11*, *tph1a*, *drd3*, and *gsk3b* genes, respectively, and are available from Addgene (<http://www.addgene.org/crispr-cas>).

### **Web-based ZiFiT Targeter Software**

The ZiFiT Targeter website (<http://zifit.partners.org/>) was updated to include an option to identify potential target sites for our sgRNA:Cas9 system. Users can query up to 96 sequences at once and indicate the specific nucleotide that they are interested in altering. ZiFiT Targeter will analyze these query sequences and return sites that either flank the nucleotide of interest or are as close to it as possible. If no nucleotide of interest is indicated, the program will identify target sites closest to the center of the query sequence. By default, ZiFiT Targeter will identify sites that meet the following criteria: 5'-GG-(N)<sub>18</sub>-NGG-3'. The 5' GG dinucleotide is part of the T7 promoter and users can relax this constraint if they wish. ZiFiT Targeter also returns a downloadable list of the sequences of oligonucleotides that need to be synthesized and cloned into the pDR274 vector to create a sgRNA expression vector for each target site of interest.

### **Zebrafish care**

All zebrafish care and uses were approved by the Massachusetts General Hospital Subcommittee on Research Animal Care.

### **Production of sgRNA and Cas9 mRNA**

sgRNAs were transcribed using the DraI-digested gRNA expression vectors as templates and the MAXIscript T7 kit (Life Technologies). The Cas9 mRNA was transcribed using PmeI-digested Cas9 expression vector and the mMACHINE T7 ULTRA kit (Life Technologies). Following completion of transcription, the poly(A) tailing reaction and DNase I treatment were performed according to the manufacturer's instructions for the Cas9-encoding mRNA. Both the sgRNA and the Cas9-encoding mRNA were then purified by LiCl precipitation and re-dissolved in RNase-free water.

### **Microinjection of zebrafish embryos and evaluation of nuclease-associated toxicity**

sgRNA and Cas9-encoding mRNA were co-injected into one-cell stage zebrafish embryos. Each embryo was injected with 2 nl of solution containing ~12.5ng/μl of sgRNA and ~300ng/μl of Cas9 mRNA unless otherwise indicated. On the next day, injected embryos were inspected under stereoscope and were classified as dead, deformed or normal phenotypes. Only embryos that developed normally were assayed

for target site mutations using T7 Endonuclease I assay or DNA sequencing (see below). Genomic DNA was extracted from either single embryos or ten pooled embryos and then used for either T7 Endonuclease I assays or DNA sequencing experiments as described below.

### **T7 Endonuclease I (T7EI) mutation detection assays**

Targeted genomic loci were amplified from genomic zebrafish DNA from single embryos using primers designed to anneal approximately 150 to 200 base pairs upstream and downstream from the expected cut site and Phusion Hot Start II high-fidelity DNA polymerase (New England Biolabs) according to the manufacturer's instructions. A list of the primers used in this study is provided in **Supplementary Table 5**. PCR products were purified with Ampure XP (Agencourt) according to the manufacturer's instructions. T7 Endonuclease I assays were performed and estimated NHEJ frequencies were calculated as previously described<sup>1</sup>.

### **DNA Sequencing of Mutated Endogenous Gene Target Sites**

Each target locus was amplified by PCR from pooled genomic DNA of ten injected embryos. The resulting PCR products were cloned into a plasmid using the pGEM-T kit (Promega) or Zero Blunt TOPO PCR cloning kit (Life Technologies). Following transformation of these reactions, plasmid DNAs isolated from overnight cultures of single colonies were sequenced by the Massachusetts General Hospital DNA Sequencing Core. Mutated alleles were identified by comparison to the wild-type unmodified sequence. Single base substitutions, deletions, or insertions were not designated as mutant alleles because we could not exclude the possibility that these alterations might also be generated by the PCR amplification process.

## Supplementary Discussion

### Calculated frequencies of cells bearing bi-allelic alterations in mutagenized embryos

We observed mean mutagenesis frequencies of endogenous zebrafish gene loci in the pooled genomic DNA of ten injected embryos that ranged from ~24 to 60% as judged by the T7EI assay (**Table 1** and **Supplementary Table 3**). Assuming that the frequency of mutations is independent, the percentage of cells bearing bi-allelic alterations in an embryo would be expected to be approximately the square of the observed mutagenesis frequency. For example, if the allele mutagenesis frequency was 50% then the expectation is that approximately 25% of cells in that population would bear bi-allelic alterations ( $0.5 \times 0.5 = 0.25$ ). Using this equation, we calculate that ~6 to 36% of cells should bear bi-allelic mutations for the various loci we successfully targeted. However, the actual percentages of cells with bi-allelic alterations may be even higher because: (1) the T7EI assay can underestimate frequencies of mutations on the high end of the range and (2) our experience using engineered nucleases in other cell types suggests that the probabilities of mutagenic events are not always completely independent.

***fh* (site #1)**

Mutations in 47 out of 88 sequenced alleles

|                                                                       |                  |
|-----------------------------------------------------------------------|------------------|
| GAGAGCAGTAGTTCCGC <u>ccc</u> CGGTCGCCATGTACCGCTCCGCTCGCTCCCTGCATCGCTT | Wild-type        |
| GAGAGCAGTAGTTCCGCCCCGGagatgtaccgctccgctcgccatgtacCGCCATGTAC           | +26 (-1,+27)     |
| GAGAGCAGTAGTTCCGCCCCGGaatgttccgctTCGCCATGTACCGCTCCGCTCGCTCC           | +11              |
| GAGAGCAGTAGTTCCGCCCCGGTaccgccccgggtacCGCCATGTACCGCTCCGCTCGC           | +14              |
| GAGAGCAGTAGTTCCGCCCCGGTaccatgtacCGCCATGTACCGCTCCGCTCGCTCCCT           | +9               |
| GAGAGCAGTAGTTCCGCCCCGGcagtagtTCGCCATGTACCGCTCCGCTCGCTCCCTGC           | +7               |
| GAGAGCAGTAGTTCCGCCCCGGccatgtacCGCCATGTACCGCTCCGCTCGCTCCCTGC           | +7 (-1,+8)       |
| GAGAGCAGTAGTTCCACCCcagttgaaaaTCGCCATGTACCGCTCCGCTCGCTCCCTGCA          | +6 (-3,+9)       |
| GAGAGCAGTAGTTCCGCCCCGtctgacttgacCGCCATGTACCGCTCCGCTCGCTCCCTGCATC      | +4 (-7,+11) [x2] |
| GAGAGCAGTAGTTCCGCCCCGatgtTCGCCATGTACCGCTCCGCTCGCTCCCTGCATCGC          | +2 (-2+4)        |
| GAGAGCAGTAGTTCCGCCCCGGagTCGCCATGTACCGCTCCGCTCGCTCCCTGCATCGC           | +2               |
| GAGAGCAGTAGTTCCGCCCCGcccCCATGTACCGCTCCGCTCGCTCCCTGCATCGCTT            | -1 (-4,+3)       |
| GAGAGCAGTAGTTCCGCCCCCGCCATGTACCGCTCCGCTCGCTCCCTGCATCGCTT              | -4               |
| GAGAGCAGTAGTTCCGCCCCCGCCATGTACCGCTCCGCTCGCTCCCTGCATCGCTT              | -3               |
| GAGAGCAGTAGTTCCGCCCCCGGCCATGTACCGCTCCGCTCGCTCCCTGCATCGCTT             | -3               |
| GAGAGCAGTAGTTCCGCCCCCGCCATGTACCGCTCCGCTCGCTCCCTGCATCGCTT              | -4 [x5]          |
| GAGAGCAGTAGTTCCGCCCCCGCCATGTACCGCTCCGCTCGCTCCCTGCATCGCTT              | -4               |
| GAGAGCAGTAGTTCCGCCCCCGGaatgtacagCCGCTCGCTCCCTGCATCGCTT                | -6 (-15,+9)      |
| GAGAGCAGTAGTTCCGCCCCCGCCATGTACCGCTCCGCTCGCTCCCTGCATCGCTT              | -6               |
| GAGAGCAGTAGTTCCGCCCCCGCCATGTACCGCTCCGCTCGCTCCCTGCATCGCTT              | -7               |
| GAGAGCAGTAGTTCCGCCCCCGATGTACCGCTCCGCTCGCTCCCTGCATCGCTT                | -8 [x2]          |
| GAGAGCAGTAGTTCCGCCCCCGATGTACCGCTCCGCTCGCTCCCTGCATCGCTT                | -9 (-11,+2)      |
| GAGAGCAGTAGTTCCGCCCCCGCCATGTACCGCTCCGCTCGCTCCCTGCATCGCTT              | -9               |
| GAGAGCAGTAGTTCCGCCCCCGcagcagtagtcCTCGCTCCCTGCATCGCTT                  | -10 (-20,+10)    |
| GAGAGCAGTAGTTCCGCCCCCGCCATGTACCGCTCCGCTCGCTCCCTGCATCGCTT              | -10 [x7]         |
| GAGAGCAGTAGTTCCGCCCCCGATGTACCGCTCCGCTCGCTCCCTGCATCGCTT                | -10              |
| GAGAGCAGTAGTTCCGCCCCCGCCATGTACCGCTCCGCTCGCTCCCTGCATCGCTT              | -11              |
| GAGAGCAGTAGTTCCGCCCCCGgggaaGCTCGCTCCCTGCATCGCTT                       | -12 (-17,+5)     |
| GAGAGCAGTAGTTCCGCCCCCGCTCCGCTCGCTCCCTGCATCGCTT                        | -14              |
| GAGAGCAGTAGTTCCGCCCCCGTGTACCGCTCCGCTCGCTCCCTGCATCGCTT                 | -17              |
| GAGAGCAGTAGTTCCGCCCCCGCTCGCTCCCTGCATCGCTT                             | -20              |
| GAGAGCAGTAGTTCCGCCCCCGTCCCTGCATCGCTT                                  | -29              |
| GAGAGCAGTAGTTCCGCCCCCGtccgcc                                          | -50 (-56,+6)     |
| GAGAGCAGTAGTTCCGCCCCCG                                                | -53              |
| GAGAGCAGTAGTTCCGCCCCCG                                                | -66              |
| GAGAGCAGTAGTTCCGCCCCCG                                                | -92              |

**Supplementary Figure 1** Targeted indel mutations induced by engineered sgRNA:Cas9 at the *fh* gene (site #1). Alleles shown were amplified from pooled genomic DNA isolated from ten embryos that had been injected with 36.2 ng/ul of sgRNA and 100 ng/ul of Cas9 mRNA (embryos injected at these concentrations of RNA were used because these conditions yielded one of the highest mean mutation frequencies in the optimization experiments shown in **Supplementary Table 1**). The wild-type sequence is shown at the top with the reverse complement of the target site highlighted in green and the reverse complement of the PAM sequence highlighted as red underlined text. Deletions are shown as red dashes highlighted in grey and insertions as lower case letters highlighted in blue. The net change in length

caused by each indel mutation is to the right of each sequence (+, insertion; -, deletion). Note that some alterations have both insertions and deletions of sequence and in these instances the alterations are enumerated in the parentheses. The number of times each mutant allele was isolated is shown in brackets.

**fh (site #2)**

Mutations in 20 out of 20 sequenced alleles

|                                                                       |                      |              |
|-----------------------------------------------------------------------|----------------------|--------------|
| AGTTCGGCCCCCGGTTCG <b>CCA</b> TGTACCGCTCCGCTCGCTCC                    | CTGCATCGCTTCAGCGCGAG | Wild-type    |
| AGTTCGGCCCCCGGTTCGCCAT <b>ccgcccccggtcg</b> CCGCTCCGCTCGCTCCCTGCATCGC |                      | +11 (-3,+14) |
| AGTTCGGCCCCCGGTTCGCCA-----CCGCTCCGCTCGCTCCCTGCATCGCTTCAGCGCGAG        |                      | -4 [x4]      |
| AGTTCGGCCCCCGGTTCGC-----CGCTCCGCTCGCTCCCTGCATCGCTTCAGCGCGAG           |                      | -7           |
| AGTTCGGCCCCCGGTTC-----CGCTCCGCTCCCTGCATCGCTTCAGCGCGAG                 |                      | -14          |
| AGTTCGGCCCCCG-----CTCCGCTCGCTCCCTGCATCGCTTCAGCGCGAG                   |                      | -14          |
| AGTTCGGCCC-----TCCGCTCCCTGCATCGCTTCAGCGCGAG                           |                      | -18          |
| AGTTCGGCC-----CCCGCTCGCTCCCTGCATCGCTTCAGCGCGAG                        |                      | -19          |
| AGTTCGGCCCCCGCTCGC-----TCCCTGCATCGCTTCAGCGCGAG                        |                      | -19 [x3]     |
| AGTTCGGC-----TCCGCTCGCTCCCTGCATCGCTTCAGCGCGAG                         |                      | -20          |
| AGTTCGGCTC-----CGCTCCGCTCCCTGCATCGCTTCAGCGCGAG                        |                      | -20 [x3]     |
| AGT-----CGCTCCGCTCCCTGCATCGCTTCAGCGCGAG                               |                      | -27          |
| AGTTCGGCCCCCGGTTCGCCA-----TGCATCGCTTCAGCGCGAG                         |                      | -21          |
| AGTTCGGCCCCCGGTTCGCCATGT <b>cgctc</b> -----                           |                      | -45 (-50,+5) |

**th1**

Mutations in 20 out of 64 sequenced alleles

|                                                                       |                   |             |
|-----------------------------------------------------------------------|-------------------|-------------|
| AGGCGGCAGAGTTTGATCGA <b>GGATGCGCGTAAGGAGCGCG</b> AGG                  | CGGCGGCCGCGGCGGCG | Wild-type   |
| AGGCGGCAGAGTTTGATCGAGGATGCGCGTAAGG <b>gggcgcgtaa</b> GGCGGCGGCCGCGGCG |                   | +3 (-7,+10) |
| AGGCGGCAGAGTTTGATCGAGGATGCGCGTAAGGAGCGCG <b>cg</b> AGGCGGCGGCCGCGGCGG |                   | +2          |
| AGGCGGCAGAGTTTGATCGAGGATGCGCGTAAGGAG <b>cg</b> GCGAGGCGGCGGCCGCGGCGG  |                   | +2 (-1,+3)  |
| AGGCGGCAGAGTTTGATCGAGGATGCGCGTAAGGAG-----AGGCGGCGGCCGCGGCGGCG         |                   | -4          |
| AGGCGGCAGAGTTTGATCGAGGATGCGCGTA-----CGCGAGGCGGCGGCCGCGGCGGCG          |                   | -5          |
| AGGCGGCAGAGTTTGATCGAGGATGCGCGTAAG-----GAGGCGGCGGCCGCGGCGGCG           |                   | -6 [x7]     |
| AGGCGGCAGAGTTTGATCGAGGATGCGC-----GAGGCGGCGGCCGCGGCGGCG                |                   | -11 [x2]    |
| AGGCGGCAGAGTTTGATCGAGGATGCGCGTAAGG-----CGGCCGCGGCGGCG                 |                   | -12         |
| AGGCGGCAGAGTTTGA-----CGAGGCGGCGGCCGCGGCGGCG                           |                   | -22         |
| AGGCGGCAGAGTTTGATCGAGGATGCG-----CGCGGCGGCG                            |                   | -23         |
| AGGCGGCAGAGTTTGATCGAGGATGCGCGTAAGGAG-----                             |                   | -28         |
| AGGCGGCAGAGTTTGATCGAGGATGCG-----GCGGCG                                |                   | -28         |
| AGGCGGCAGAGTTTGATCGAGGATGCGCGTAA-----G                                |                   | -27         |

**apoea**

Mutations in 11 out of 38 sequenced alleles

|                                                                      |                    |                 |
|----------------------------------------------------------------------|--------------------|-----------------|
| CAGGGGCGATTCTGTTCAG <b>GGATGAGCCAAGAAGCCGCT</b> GGG                  | AAGAGGCCGTGGATCAG  | Wild-type       |
| CAGGGGCGATTCTGTTCAGGATGAGCCAAGAAGCC-----t                            | GAAGAGGCCGTGGATCAG | -4 (-5,+1)      |
| CAGGGGCGATTCTGTTCAGGATGAGCCAAGAAG <b>a</b> -----GGGAAGAGGCCGTGGATCAG |                    | -4 (-5,+1) [x2] |
| CAGGGGCGATTCTGTTCAGGATGAGCCAAGAAG-----GGGAAGAGGCCGTGGATCAG           |                    | -5 [x2]         |
| CAGGGGCGATTCTGTTCAGGATGA <b>tccacg</b> -----GCTGGGAAGAGGCCGTGGATCAG  |                    | -5 (-11,+6)     |
| CAGGGGCGATTCTGTTCAGGATGAGCCAAGAAG-----GGAAGAGGCCGTGGATCAG            |                    | -6              |
| CAGGGGCGATTCTGTTCAGGATGAGCCAAG-----AAGAGGCCGTGGATCAG                 |                    | -11 [x3]        |
| CAGGGGCGATTCTGTTCAGGA <b>aaa</b> -----GAAGAGGCCGTGGATCAG             |                    | -17 (-19,+2)    |

**rgs4**

Mutations in 20 out of 43 sequenced alleles

|                                                                        |                               |             |
|------------------------------------------------------------------------|-------------------------------|-------------|
| AAAGACA <b>AGGAGAAGGTGAAGGACACTG</b> TGG                               | TCAACAGGTAAGACTGGTCCAGAATAATT | Wild-type   |
| AAAGACAAGGAGAAGGTGAAGGACA <b>acaggtaaaagctttaatttttttcacagttgaag</b>   |                               | +35         |
| AAAGACAAGGAGAAGGTGAAGGACA <b>acaggacaaggacaa</b> CTGTGGTCAACAGGTAAGA   |                               | +16         |
| AAAGACAAGGAGAAGGTGAAGGACA <b>acaggtaaagaagg</b> TGTGGTCAACAGGTAAGACTGG |                               | +12 (-1+13) |
| AAAGACAAGGAGAAGGTGAAGGACA <b>ac</b> CTGTGGTCAACAGGTAAGACTGGTCCAGAATAA  |                               | +2          |



|                                                                       |     |        |      |
|-----------------------------------------------------------------------|-----|--------|------|
| AAAGACAAGGAGAAGGTGAAGGACT <u>tg</u> CTGTGGTCAACAGGTAAGACTGGTCCAGAATAA | +2  | (-1+3) |      |
| AAAGACAAGGAGAAGGTGAAG <u>ttgac</u> CTGTGGTCAACAGGTAAGACTGGTCCAGAATAAT | +1  | (-4+5) |      |
| AAAGACAAGGAGAAGGTGAAGGAC-CTGTGGTCAACAGGTAAGACTGGTCCAGAATAATT          | -1  |        | [x4] |
| AAAGACAAGGAGAAGGTGAAGGAC--TGTGGTCAACAGGTAAGACTGGTCCAGAATAATT          | -2  |        |      |
| AAAGACAAGGAGAAGGTGAAGGAC <u>c</u> ---TGGTCAACAGGTAAGACTGGTCCAGAATAATT | -3  | (-4+1) |      |
| AAAGACAAGGAGAAGGTGAAGGAC-----AACAGGTAAGACTGGTCCAGAATAATT              | -9  |        |      |
| AAAGACAAGGAGAAGGTG-----TGGTCAACAGGTAAGACTGGTCCAGAATAATT               | -10 |        | [x2] |
| AAAGACAAGGAGAAGGTGAAGG-----ACAGGTAAGACTGGTCCAGAATAATT                 | -12 |        |      |
| AAAGACAAGGAGAAG-----TCAACAGGTAAGACTGGTCCAGAATAATT                     | -16 |        |      |
| AAAGACAAGGAGAAGGTG-----AAGACTGGTCCAGAATAATT                           | -22 |        |      |
| -----GTGGTCAACAGGTAAGACTGGTCCAGAATAATT                                | -48 |        | [x2] |

***tph1a***

Mutations in 7 out of 16 sequenced alleles

|                                                                                                       |     |  |           |
|-------------------------------------------------------------------------------------------------------|-----|--|-----------|
| GAGTCTTCAGAGACAGG <u>ccg</u> <u>ggctg</u> <u>cggtt</u> <u>gtgtttt</u> <u>ccg</u> TGAAAAATGAAGTCGGTGGG |     |  | Wild-type |
| GAGTCTTCAGAGAGAGGCCGGGCTG <u>tg</u> CGGTTGTGTTTTCCCTGAAAAATGAAGTCGGTG                                 | +2  |  |           |
| GAGTCTTCAGAGACAGGCCGG--GCGGTTGTGTTTTCCCTGAAAAATGAAGTCGGTGGG                                           | -3  |  |           |
| GAGTCTTCAGAGAGAGGCCGGCTG-----TGTGTTTTCCCTGAAAAATGAAGTCGGTGGG                                          | -6  |  |           |
| GAGTCTTCAGAGAGAGGCCGG-----TTGTGTTTTCCCTGAAAAATGAAGTCGGTGGG                                            | -7  |  |           |
| GAGTCTTCAGAGAGAGGC-----CGGTTGTGTTTTCCCTGAAAAATGAAGTCGGTGGG                                            | -7  |  |           |
| GAGTCTTCAGAGACAGGCC-----GTTTTCCCTGAAAAATGAAGTCGGTGGG                                                  | -13 |  |           |
| GAG-----CGGTTGTGTTTTCCCTGAAAAATGAAGTCGGTGGG                                                           | -22 |  |           |

***drd3***

Mutations in 5 out of 19 sequenced alleles

|                                                                                                 |     |          |           |
|-------------------------------------------------------------------------------------------------|-----|----------|-----------|
| AGCATTCAATTCACCCCTGGG <u>g</u> <u>gaaact</u> <u>tacagcccagcgtc</u> <u>agg</u> CGTTGAAGAAGCGAAGA |     |          | Wild-type |
| AGCATTCAATTCACCCCTGGGGGAAACTACAGCCAGC <u>tgtagttg</u> <u>aagaagcga</u> gTCAG                    | +18 |          |           |
| AGCATTCAATTCACCCCTGGGGGAAACTACAGCC <u>acaactacaact</u> TCAGGCGTTGAAGAA                          | +7  | (-5,+12) |           |
| AGCATTCAATTCACCCCTGGGGGAAACTACAGCCAG--TCAGGCGTTGAAGAAGCGAAGA                                    | -2  |          | [x2]      |
| AGCATTCAATTCACCCCTGGGGGAAACTACAGCCAG-----GCGTTGAAGAAGCGAAGA                                     | -6  |          |           |

**Supplementary Figure 2** Targeted indel mutations induced by engineered sgRNA:Cas9 at the *fh* (site #2), *th1*, *apoea*, *rgs4*, *tph1a*, and *drd3* genes. The wild-type sequence is shown at the top with the target sites highlighted in yellow and the PAM sequence highlighted as red underlined text. For some genes, the target site is on the reverse complement strand and in these cases the reverse complement of the target site is highlighted in green and the reverse complement of the PAM site is highlighted as red underlined text. Deletions are shown as red dashes highlighted in grey and insertions as lower case letters highlighted in blue. The net change in length caused by each indel mutation is to the right of each sequence (+, insertion; -, deletion). Note that some alterations have both insertions and deletions of sequence and in these instances the alterations are enumerated in the parentheses. The number of times each mutant allele was isolated is shown in brackets. A minor sequence polymorphism observed in the *tph1a* gene is underlined.

For each gene, the sequences of alleles shown were amplified from pooled genomic DNA isolated from ten embryos. The mutation efficiencies at these genes have also been assessed in single embryos by T7EI assay as shown in **Table 1**. See also **Figure 1d**.

**a**

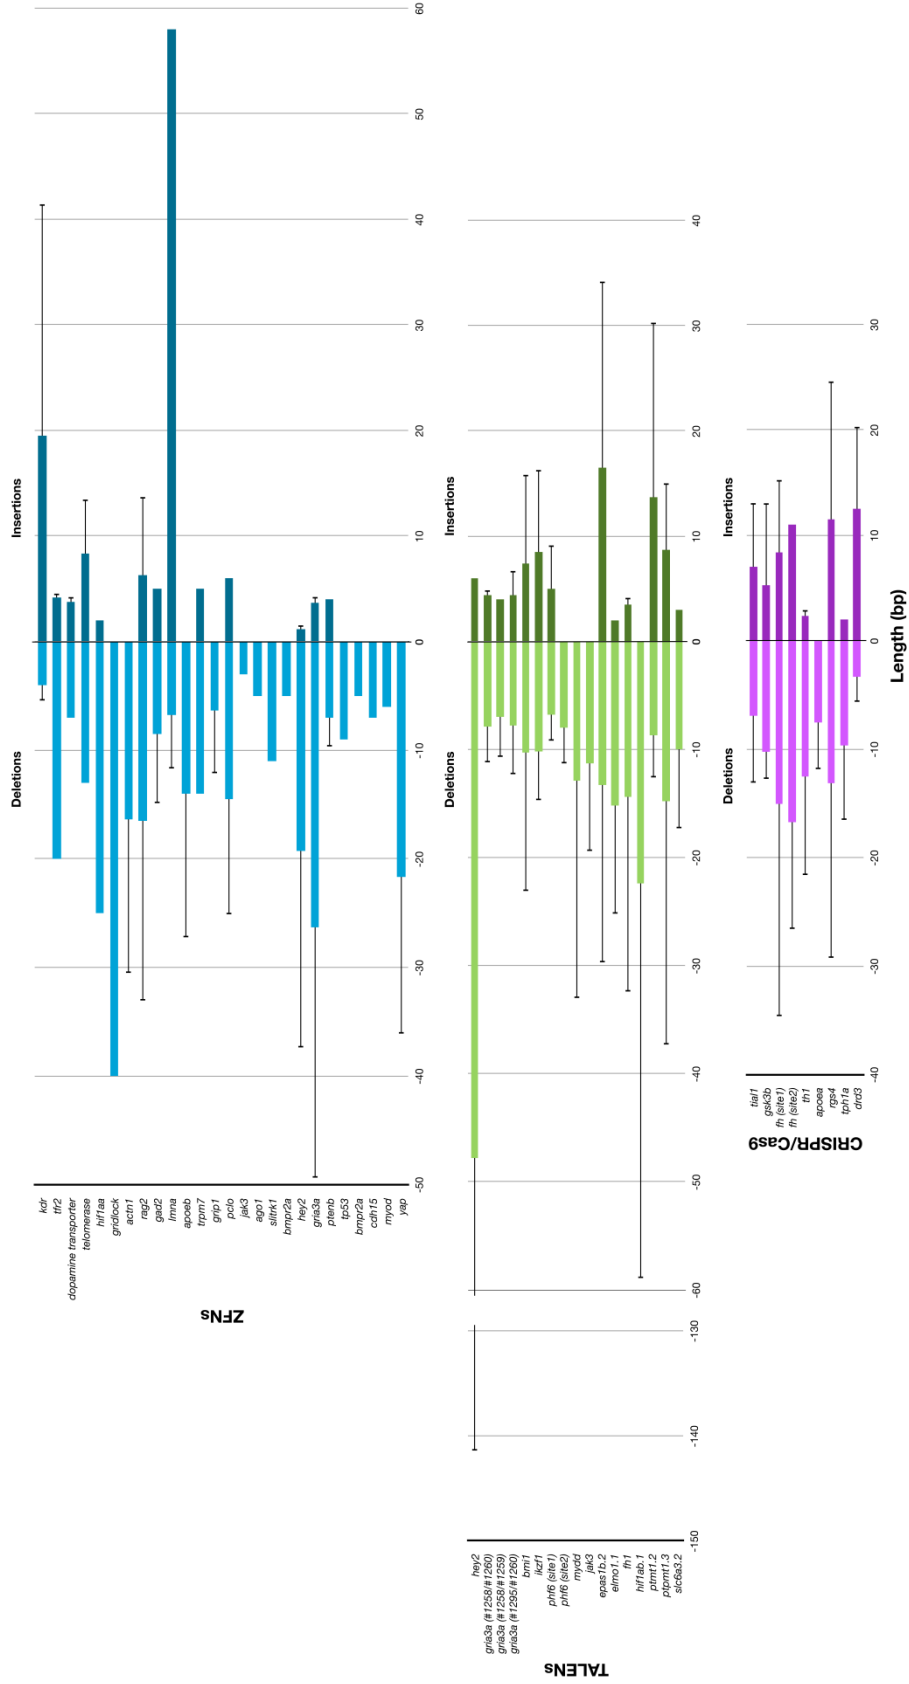

**b**

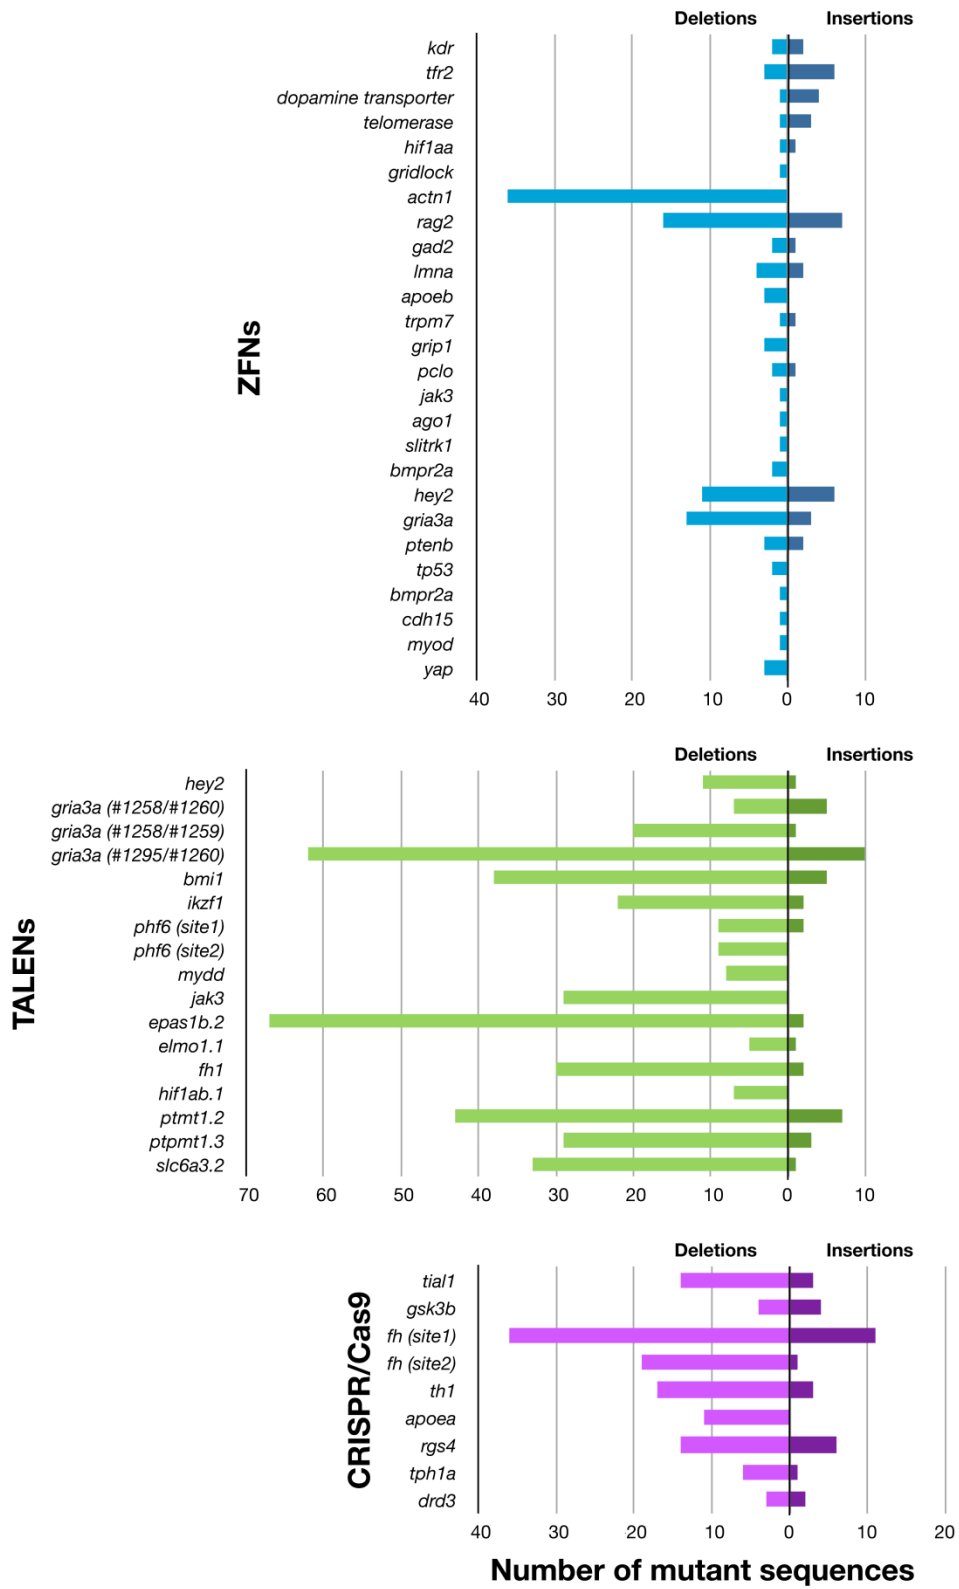

**Supplementary Figure 3** Comparison of the length and types of indel mutations induced by ZFNs, TALENs, and sgRNA:Cas9 nuclease. **(a)** Mean lengths of deletion and insertion mutations are shown for various endogenous zebrafish gene targets altered by ZFNs (blue colored bars), TALENs (green colored bars), and sgRNA:Cas9 nuclease (purple colored bars). Error bars represent standard deviations. **(b)** Numbers of deletion and insertion mutant sequences for various endogenous zebrafish gene targets altered by ZFNs, TALENs, and sgRNA:Cas9 nuclease are shown (color-coded as in (a)). For both (a) and (b), mutation data for ZFNs and TALENs were derived from previously published studies that used ZFNs and TALENs made by the Joung lab<sup>2-6</sup> and mutation data for sgRNA:Cas9 were from the experiments of this report.

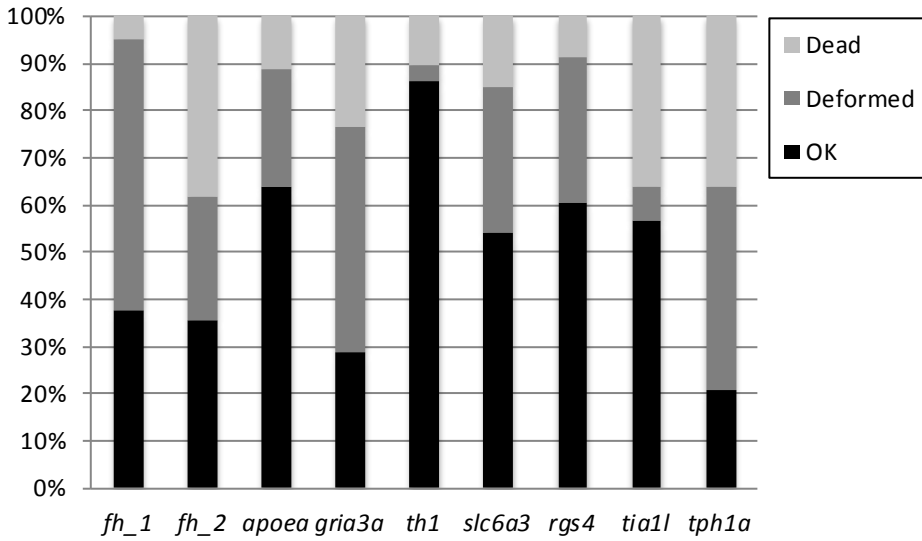

**Supplementary Figure 4** Toxicities of engineered sgRNA:Cas9 nucleases in zebrafish embryos. 2 nl containing ~12.5 ng/ $\mu$ l of sgRNA and ~300 ng/ $\mu$ l of Cas9-encoding mRNA were injected into 1-cell stage zebrafish embryos. Names of the target genes are shown on the x-axis. One day following injection, numbers of normal (OK), deformed and dead embryos were scored. Bars indicate the percentages of the embryos in each phenotypic category. Between 77 to 198 embryos were scored for each target site.

+  
TAATACGACTCACTA **TAC** **GAGAGACCGAGAGAGGGTCTCA** *GTTTTAGAGCTAGAAATAGCAAGTTAAAAT AAGGCTAGTCCGTTAT*  
T7 promoter            BsaI            BsaI            Guide RNA  
CAACTTGAAAAAGTGGCACCGAGTCCGGTGCT ***TTTAAAA***AGCTTGATCGACGAGAGCAGCGCGACTGGATCTGTGCCCCGTCTCAA  
DraI  
ACGCAACCCCTCCGGCGGTTCGCATATCATTAGGACGAGCCTCAGACTCCAGCGTAACTGGACTGCAATCAACTCACTGGCTCACCT  
TCCGGTCCACGATCAGCTAGAATCAAGCTGACTAGATAAACTGGCCGTCTGTTTTACACGGG  
M13 primer  
TGGGCCTTTCTTCGGTAGAAAAATCAAAGGATCTTCTTGAGATCCTTTTTTTCTGCGCGTAATCTGCTGCTTGCAAACAAAAAACC  
ACCGTACCAGCGGTGGTTTTGTTTGCCGGATCAAGAGCTACCAACTCTTTTTCCGAGGTAACCTGGCTTACAGCAGAGCGCAGATAACC  
AAATACTGTTCTTAGTGTAGCCGTAGTTAGGCCACCACTTCAAGAACTCTGTAGCACCGCTACATACCTCGCTCTGCTAATCC  
TGTTACCAGTGGCTGCTGCCAGTGGCGATAAGTCGTGTCTTACC GGTTGGACTCAAGACGATAGTTACCGGATAAGGCGCAGCCG  
TCGGGCTGAACGGGGGGTTCGTGCACACAGCCCAGCTTGGAGCGAACGACCTACACCGAAGTGAAGATACCTACAGCGTGAGCTATG  
AGAAAGCGCCACGCTTCCCGAAGGGAGAAAGGCGGACAGGTATCCGGTAAGCGGCAGGGTTCGGAACAGGAGAGCGCACGAGGGGAGC  
TTCCAGGGGGAAACGCTGGTATCTTATAGTCCGTCGGGTTTTCCGCACCTCTGACTTGAGCATCGATTTTTGTGATGCTCGTCA  
GGGGGGCGGAGCCTATGGAAAAACGCCAGCAACGCGAGAAAGGCCACCCGAAGGTGAGCCAGGTGATTACATTTAGGTCTCTATTA  
GAAAACTCATCGAGCATCAAGTGAACCTGCAATTTATTCATATCAGGATTATCAATACCATATTTTTGAAAAAGCCGTTTTCTGTA  
ATGAAGGAGAAAACTCACCGAGGCAGTTCATAGGATGGCAAGATCTGGTATCGGTCTGCGATTCCGACTCGTCCAACATCAATA  
CAACCTATTAATTTCCCTCGTCAAAAATAAGGTTATCAAGTGAGAAATCACCATGAGTGACGACTGAATCCGGTGAGAATGGCAA  
GAGTTTATGCATTTCTTCCAGACTTGTTCAACAGGCCAGCCATTACGCTCGTCAAAAATCACTCGCACCAACCAAACCGTTAT  
TCATTCGTGATTGCGCCTGAGCGAGACGAAATACCGGATCGCCGTTAAAAGGACAATTACAAACAGGAATCGAATGCAACCGGGCG  
AGGAACACTGCCAGCGCATCAACAATTTTTACCTGAATCAGGATATTTCTTAATACCTGGAATGCTGTTTTCCCTGGGATCGC  
AGTGGTGAGTAACCATGCATCATCAGGAGTACGGATAAAATGCTTGATGGTCCGGAAGAGGCATAAATCCGTCAGCCAGTTTAGCC  
TGACCATCTCATCTGTAACATCATTGGCAACGCTACCTTTGCCATGTTTCAGAAACAACTCTGGCGCATCGGGCTTCCCATACAAT  
CGATAGATTGTCGCACCTGATTGCCCGACATTATCGCGAGCCCAATTTATACCCATATAAATCAGCATCCATGTTGGAATTTAATCG  
CGGCTTCAAGCAAGACGTTTTCCCGTTGAATATGGCTCATTTTAGCTTCTTAGCTCCTGAAAATCTCGATAACTCAAAAATACGC  
CCGGTAGTGATCTTATTTCAATTATGGTGAAGTTGGAACCTCTTACGTGCCGATCAAGTCAAAAGCCTCCGGTCGGAGGCTTTTTGA  
CTTTCGCTATGGAGTTCAGGTATGATTTAAATGGTCAGTATTGAGCCTCAGGAAACAGCTATGCATCAAGCTGACTAGATAATC  
TAGCTGATCGTGGACCGATCATACGTATAATGCCGTAAGATCACGGTTCGACGACAGCTCGCGGTCCAGTAGTGATCGACACTGC  
TCGATCCGCTCGCACCGCTAGC

**Supplementary Figure 5** Full DNA sequence of sgRNA expression vector pDR274. T7 promoter is underlined and the start site of transcription (+1) is marked with a + and highlighted in green. The pair of BsaI restriction sites used for cloning are indicated in bold text and the DraI restriction site used to linearize the plasmid for run-off transcription is shown in bold, italicized text. The “stuffer” sequence that is replaced with the annealed oligonucleotides to create customized sgRNAs is highlighted in yellow and the remainder of the full length sgRNA is shown as italicized underlined text. The sequence of an M13 primer binding site is shown as underlined text.

| Reference                            | sgRNA sequence (5' to 3')                                                                                         | Length  |
|--------------------------------------|-------------------------------------------------------------------------------------------------------------------|---------|
| Jinek et al.,<br><i>Science</i> 2012 | NNNNNNNNNNNNNNNNNNNNNNNGUUUUAGAGCUAGAAAUA<br>GCAAGUUAAAAUAAGGCUAGUCCG                                             | 62 nts  |
| This work                            | GGNNNNNNNNNNNNNNNNNNNNNNNGUUUUAGAGCUAGAAAUA<br>GCAAGUUAAAAUAAGGCUAGUCCGUUAUCAACUUGAAAA<br>AGUGGCACCGAGUCGGUGCUUUU | 100 nts |

**Supplementary Table 1** Sequences of sgRNAs used in previously published *in vitro* work (Jinek et al., 2012<sup>7</sup>) and in the current *in vivo* study.



| Target gene         | Target site (5' - 3') (PAM is underlined) | Oligonucleotide 1 (5' - 3') | Oligonucleotide 2 (5' - 3') |
|---------------------|-------------------------------------------|-----------------------------|-----------------------------|
| <i>apoea</i>        | GGATGAGCCAAGAAGCCGCT <u>GGG</u>           | TAGGATGAGCCAAGAAGCCGCT      | AAACAGCGGCTTCTTGGCTCAT      |
| <i>gria3a</i>       | GGTGGTATTTTTTTGAGTGT <u>GGG</u>           | TAGGTGGTATTTTTTTGAGTGT      | AAACACACTCAAAAAAATACCA      |
| <i>th1</i>          | GGATGCGCGTAAGGAGCGCG <u>AGG</u>           | TAGGATGCGCGTAAGGAGCGCG      | AAACCGGCTCCTTACGCGCAT       |
| <i>fh (Site #1)</i> | GGAGCGGTACATGGCGACCGGG                    | TAGGAGCGGTACATGGCGACCG      | AAACCGGTCCCATGTACCGCT       |
| <i>fh (Site #2)</i> | GGAGCGAGCGGAGCGGTACAT <u>GG</u>           | TAGGAGCGAGCGGAGCGGTACA      | AAACTGTACCGCTCCGCTCGCT      |
| <i>slc6a3</i>       | GGTGCCGTATCTCTTCTC <u>ATGG</u>            | TAGGTGCCGTATCTCTTCTTCA      | AAACTGAAGAAGAGATACGGCA      |
| <i>rgs4</i>         | GGAGAAGGTGAAGGACACTGT <u>GG</u>           | TAGGAGAAGGTGAAGGACACTG      | AAACCAGTGTCTTACCTTCT        |
| <i>tia11</i>        | GGTATGTTCGGGAACCTCTCC <u>AGG</u>          | TAGGTATGTTCGGGAACCTCTCC     | AAACGGAGAGGTTCCCGACATA      |
| <i>tph1a</i>        | GGGAAAACACAACCGCAGCC <u>CGG</u>           | TAGGAAAACACAACCGCAGCC       | AAACGGCTGCGGTTGTGTTTC       |
| <i>gsk3b</i>        | GGGACCTGACCGCCGCAGG <u>AGG</u>            | TAGGGACCTGACCGCCGCAGG       | AAACCCTGCGGCCGGTCAGGTC      |
| <i>drd3</i>         | GGAAACTACAGCCAGCGTC <u>AGG</u>            | TAGGAAACTACAGCCAGCGTC       | AAACGACGCTGGGCTGTAGTTT      |

**Supplementary Table 2** Eleven zebrafish gene sites targeted in this study and oligonucleotides used to make the associated customized sgRNA expression vectors.

| sgRNA<br>(ng/ul) | Cas9<br>mRNA<br>(ng/ul) | Indel Mutation Frequency |              |              |              |              |                  |
|------------------|-------------------------|--------------------------|--------------|--------------|--------------|--------------|------------------|
|                  |                         | Embryo<br>#1             | Embryo<br>#2 | Embryo<br>#3 | Embryo<br>#4 | Embryo<br>#5 | Mean $\pm$ SEM   |
| 5                | 100                     | 15.5%                    | 15.9%        | 0.0%         | 29.5%        | 47.1%        | 21.6% $\pm$ 7.9% |
| 12.5             | 100                     | 39.5%                    | 40.4%        | 25.5%        | 51.6%        | 26.9%        | 36.8% $\pm$ 4.8% |
| 25               | 100                     | 3.9%                     | 12.5%        | 10.8%        | 12.6%        | 10.1%        | 10.0% $\pm$ 1.6% |
| 36.7             | 100                     | 14.3%                    | 44.3%        | 29.9%        | 31.7%        | 46.8%        | 33.4% $\pm$ 5.8% |
| 12.5             | 300                     | 57.8%                    | 57.3%        | 61.7%        | 35.5%        | 51.3%        | 52.7% $\pm$ 4.6% |

**Supplementary Table 3** Mutation frequencies in the *fh* gene (site #1) induced by various concentrations of sgRNA and Cas9 mRNA. For each set of RNA concentrations used, up to five individual embryos were assessed for indel mutation frequency using the T7EI assay (Supplementary Methods). Mean mutation frequencies of the five individual embryos for each set of concentrations are also shown with standard errors of the mean.

| Gene          | Nuclease Platform | Target sequence (5' to 3')                            | Indel Mutation Frequency (%) |
|---------------|-------------------|-------------------------------------------------------|------------------------------|
| <i>fh</i>     | TALENs            | TCGCTTCAGCGCGAGTTTGTTCAGATCTGCGGGCCGCTCAGAGATCCATCAAA | 60.0                         |
| <i>th1</i>    | TALENs            | FCTCAGAAGTTTGTGGGAGGCGGCAGAGTTTGATCGAGGATGCGCGTAAGGA  | 51.4                         |
| <i>tia11</i>  | TALENs            | TGTTACGGAGGCCCTCATCCTGCAAGTGTCTCTCAGATCGGCCCCCTGCAAGA | 76.3                         |
| <i>apoea</i>  | TALENs            | TTTCAGGATGAGCCAAGAAGCCGCTGGGAAGAGGCCGTGGATCAGTTCTGGA  | 20.6                         |
| <i>rgs4</i>   | TALENs            | TGCCAAAGATATAAAACAATAAGATTGGCTTCCTGCTTCAAAGCCAGATCCA  | 24.1                         |
| <i>tph1a</i>  | TALENs            | TGAACAAATCTGCTTTCACGAAGATCGAGGAGAATAAAGACAACAAAACAGA  | 21.9                         |
| <i>drd3</i>   | TALENs            | TCATTACCCCTGGGGGAACTACAGCCAGCGTCAGGCGTTGAAGAAGCGA     | 0                            |
| <i>gsk3b</i>  | TALENs            | TGGCGACTCCTGGACAGGACCTGACCGGCCGAGGAGGTCAGCTACTGA      | 0                            |
| <i>slc6a3</i> | TALENs            | TCCTGGTGCCGTATCTCTTCTTCATGGTGATCGCCGGGATGCCGCTCTTCTA  | 50.0                         |
| <i>gria3a</i> | TALENs            | TCGTCCAATAGCTTCTCAGTCACGCACGCCTGTGAGTTTCTGCTCTTTA     | 61.0                         |
| <i>gria3a</i> | ZFNs              | AGCTTCTCAGTCACGCACGCCTGTGAGTTT                        | 25.8                         |

**Supplementary Table 4** Previously determined TALEN- and ZFN-induced mutation frequencies for the ten genes targeted in this study. Indel mutation frequency was determined as previously described<sup>4</sup>. Data for the *gria3a*, *fh*, and *slc6a3* genes were previously published<sup>2,4</sup> and the remaining data are unpublished results from our groups.

| Target site   | Primer Name | Primer sequence (5'-3')    | Experiment          |
|---------------|-------------|----------------------------|---------------------|
| <i>fh</i>     | JY165       | CAGGCTGTTGAACCGTAGATTTAGT  | T7E1 and sequencing |
|               | JY166       | TCCACATGTTTTGAGTTTGAGAGTC  |                     |
| <i>th1</i>    | JY190       | GGAGATGTAAATCACCTCCATCTGA  | T7E1 and sequencing |
|               | JY191       | ATGTTAGCTACCTCGAAAACCTTC   |                     |
| <i>tia11</i>  | JY198       | CCTGTGCTCTCCTGTTTTTAGGTAT  | Sequencing          |
|               | JY199       | AACATGGTAAGAAGCGTGAGTGTTT  |                     |
|               | oFYF414     | TGAAAACGTGGCAGAAATGA       | T7E1                |
|               | oFYF415     | GGATTTATGCAGCCCAGAGA       |                     |
| <i>apoea</i>  | JY184       | CATGCCAATTAATTTGTCAAAACA   | T7E1 and sequencing |
|               | JY185       | TTGAGATGTTTCAAAGCGTTTACTC  |                     |
| <i>rgs4</i>   | JY236       | TATGCTTGCATAAATTGAGCGTCTA  | T7E1 and sequencing |
|               | JY237       | TGAAATAAGCCATGGTAAATCACAC  |                     |
| <i>tph1a</i>  | JY192       | TTGGCAAGAGA ACTATGAGTGAATG | T7E1 and sequencing |
|               | JY193       | AAATAAAACCTCACGTTACCTGGAA  |                     |
| <i>drd3</i>   | JY220       | ACACTGCATGTTGTCAAGCATTTAT  | T7E1 and sequencing |
|               | JY221       | CTTACTTCCAAATAAACTGCCCAAG  |                     |
| <i>gsk3b</i>  | JY186       | AGTATGATTGGTGGAACACAGGAAT  | T7E1 and sequencing |
|               | JY187       | CTTACCTTAAATCGCTTGTCTGAA   |                     |
| <i>slc6a3</i> | JY155       | GTTCCATACCTGTGCTACAAGAAC   | T7E1 and sequencing |
|               | JY156       | ATTTGTGTGTCTTCCATCTGAGT    |                     |
| <i>gria3a</i> | JY027       | TCGCCGTTTCAGCTCTACAACAC    | T7E1 and sequencing |
|               | JY028       | TCAAACCCACGTCTTTGGTGAG     |                     |

**Supplementary Table 5** List of PCR primers used in this study

## Supplementary References

1. Reyon, D. et al. FLASH assembly of TALENs for high-throughput genome editing. *Nat Biotechnol* **30**, 460-465 (2012).
2. Cade, L. et al. Highly efficient generation of heritable zebrafish gene mutations using homo- and heterodimeric TALENs. *Nucleic Acids Res* **40**, 8001-8010 (2012).
3. Moore, F.E. et al. Improved somatic mutagenesis in zebrafish using transcription activator-like effector nucleases (TALENs). *PLoS One* **7**, e37877 (2012).
4. Sander, J.D. et al. Targeted gene disruption in somatic zebrafish cells using engineered TALENs. *Nat Biotechnol* **29**, 697-698 (2011).
5. Sander, J.D. et al. Selection-free zinc-finger-nuclease engineering by context-dependent assembly (CoDA). *Nat Methods* **8**, 67-69 (2011).
6. Foley, J.E. et al. Rapid mutation of endogenous zebrafish genes using zinc finger nucleases made by Oligomerized Pool ENgineering (OPEN). *PLoS One* **4**, e4348 (2009).
7. Jinek, M. et al. A programmable dual-RNA-guided DNA endonuclease in adaptive bacterial immunity. *Science* **337**, 816-821 (2012).
